# Supplementary material for: Evaluating the imazethapyr herbicide mediated regulation of phenol and glutathione metabolism and antioxidant activity in lentil seedlings
Source: PeerJ. 2024 Jan 3;12:e16370. doi: 10.7717/peerj.16370 (PMC10771082; doi:10.7717/peerj.16370)
Supplement: Supplemental Information 1 [file peerj-12-16370-s001.xlsx]

## Sheet: Sheet1
	PAL Specific Activity (µ mol CA formed /hr/mg of protein)								POD specific activity (µmol guaicol oxidised/min/mg of protein)							Phenolic content mg/g							Flavonoids content mg/g
	Treatments	R1	R2	R3	Total	Mean			Treatments	R1	R2	R3	Total	Mean		Treatments	R1	R2	R3	Total	Mean		Treatments	R1	R2	R3	Total	Mean
	T1S1	0.482994	0.483044	0.492366	1.4584	0.486135			T1S1	0.322736	0.306956	0.328799	0.958492	0.319497		T1S1	0.137802	0.138205	0.139414	0.415421	0.138474		T1S1	0.200986	0.201569	0.203319	0.605875	0.201958
	T1S2	0.287113	0.266378	0.305761	0.859253	0.286418			T1S2	0.192035	0.204674	0.253966	0.650676	0.216892		T1S2	0.139817	0.134176	0.134176	0.408168	0.136056		T1S2	0.203902	0.195737	0.195737	0.595376	0.198459
	T1S3	0.314845	0.326942	0.312869	0.954655	0.318218			T1S3	0.210401	0.205469	0.20541	0.621279	0.207093		T1S3	0.151502	0.150293	0.150293	0.452088	0.150696		T1S3	0.220817	0.219067	0.219067	0.65895	0.21965
	T1S4	0.347114	0.329572	0.34495	1.02164	0.340546			T1S4	0.237063	0.231631	0.238126	0.70682	0.235607		T1S4	0.186557	0.161575	0.161575	0.509707	0.169902		T1S4	0.237731	0.235398	0.235398	0.708526	0.236175
	T1S5	0.349257	0.344941	0.357255	1.05145	0.350484			T1S5	0.266533	0.263666	0.272148	0.802346	0.267449		T1S5	0.163993	0.165604	0.165604	0.495201	0.165067		T1S5	0.238897	0.24123	0.24123	0.721357	0.240452
	T2S1	0.482994	0.483044	0.492366	1.4584	0.486135			T2S1	0.322736	0.306956	0.328799	0.958492	0.319497		T2S1	0.137802	0.138205	0.139414	0.415421	0.138474		T2S1	0.200986	0.201569	0.203319	0.605875	0.201958
	T2S2	0.328181	0.289651	0.347417	0.965249	0.32175			T2S2	0.241814	0.253263	0.233606	0.728683	0.242894		T2S2	0.150293	0.151905	0.151905	0.454103	0.151368		T2S2	0.219067	0.2214	0.2214	0.661866	0.220622
	T2S3	0.52204	0.57526	0.522609	1.61991	0.539969			T2S3	0.364396	0.393587	0.371582	1.12956	0.376521		T2S3	0.158755	0.159963	0.159963	0.478681	0.15956		T2S3	0.231315	0.233065	0.233065	0.697444	0.232481
	T2S4	0.6583	0.724752	0.757004	2.14006	0.713352			T2S4	0.469167	0.502319	0.529344	1.50083	0.500277		T2S4	0.166007	0.163187	0.163187	0.492381	0.164127		T2S4	0.241813	0.237731	0.237731	0.717275	0.239092
	T2S5	0.807019	0.835152	0.882971	2.52514	0.841714			T2S5	0.66227	0.692643	0.727692	2.08261	0.694202		T2S5	0.169634	0.171245	0.171245	0.512125	0.170708		T2S5	0.247063	0.249396	0.249396	0.745854	0.248618
	T3S1	0.482994	0.483044	0.492366	1.4584	0.486135			T3S1	0.322736	0.306956	0.328799	0.958492	0.319497		T3S1	0.137802	0.138205	0.139414	0.415421	0.138474		T3S1	0.200986	0.201569	0.203319	0.605875	0.201958
	T3S2	0.410667	0.371124	0.461887	1.24368	0.414559			T3S2	0.298861	0.338214	0.337324	0.974399	0.3248		T3S2	0.160366	0.156337	0.156337	0.47304	0.15768		T3S2	0.233648	0.227815	0.227815	0.689279	0.22976
	T3S3	0.634106	0.724259	0.675187	2.03355	0.677851			T3S3	0.468266	0.530224	0.517105	1.5156	0.505199		T3S3	0.176081	0.180513	0.180513	0.537106	0.179035		T3S3	0.256394	0.26281	0.26281	0.782015	0.260672
	T3S4	0.952841	1.12381	1.10655	3.18321	1.06107			T3S4	0.628582	0.713652	0.720154	2.06239	0.687463		T3S4	0.186557	0.184139	0.184139	0.554835	0.184945		T3S4	0.271559	0.268059	0.268059	0.807678	0.269226
	T3S5	1.09278	1.14946	1.30114	3.54337	1.18112			T3S5	0.850082	0.89722	1.02582	2.77312	0.924373		T3S5	0.191795	0.193004	0.193004	0.577802	0.192601		T3S5	0.279141	0.280891	0.280891	0.840923	0.280308
	T4S1	0.482994	0.483044	0.492366	1.4584	0.486135			T4S1	0.322736	0.306956	0.328799	0.958492	0.319497		T4S1	0.137802	0.138205	0.139414	0.415421	0.138474		T4S1	0.200986	0.201569	0.203319	0.415421	0.201958
	T4S2	0.445684	0.442763	0.498668	1.38712	0.462372			T4S2	0.330317	0.349739	0.336392	1.01645	0.338816		T4S2	0.165604	0.163187	0.163187	0.491978	0.163993		T4S2	0.24123	0.237731	0.237731	0.716691	0.238897
	T4S3	0.722428	0.830343	0.854571	2.40734	0.802447			T4S3	0.522533	0.572116	0.583504	1.67815	0.559384		T4S3	0.181722	0.182527	0.182527	0.546777	0.182259		T4S3	0.26456	0.265726	0.265726	0.796013	0.265338
	T4S4	1.03002	1.10906	1.20018	3.33927	1.11309			T4S4	0.730463	0.806596	0.862488	2.39955	0.799849		T4S4	0.187766	0.18978	0.18978	0.567326	0.189109		T4S4	0.273309	0.276225	0.276225	0.825758	0.275253
	T4S5	1.28361	1.37412	1.47047	4.12821	1.37607			T4S5	1.02135	1.05292	1.12724	3.20151	1.06717		T4S5	0.197839	0.192198	0.192198	0.582234	0.194078		T4S5	0.28789	0.279724	0.279724	0.847338	0.282446
	T5S1	0.482994	0.483044	0.492366	1.4584	0.486135			T5S1	0.322736	0.306956	0.328799	0.958492	0.319497		T5S1	0.137802	0.138205	0.139414	0.415421	0.138474		T5S1	0.200986	0.201569	0.203319	0.605875	0.201958
	T5S2	0.575198	0.650446	0.613775	1.83942	0.61314			T5S2	0.383452	0.407711	0.422452	1.21362	0.404539		T5S2	0.169231	0.167216	0.167216	0.503663	0.167888		T5S2	0.246479	0.243563	0.243563	0.733606	0.244535
	T5S3	0.845338	0.88248	1.14851	2.87633	0.958776			T5S3	0.638816	0.657899	0.672646	1.96936	0.656454		T5S3	0.184945	0.183333	0.183333	0.551612	0.183871		T5S3	0.269226	0.266893	0.266893	0.803012	0.267671
	T5S4	1.23807	1.34489	1.38309	3.96606	1.32202			T5S4	0.89812	0.969245	0.983697	2.85106	0.950354		T5S4	0.197033	0.194615	0.194615	0.586264	0.195421		T5S4	0.286723	0.283224	0.283224	0.853171	0.28439
	T5S5	1.6056	1.86244	1.68694	5.15497	1.71832			T5S5	1.19922	1.39062	1.26373	3.85357	1.28452		T5S5	0.209927	0.193004	0.193004	0.595934	0.198645		T5S5	0.305387	0.280891	0.280891	0.867169	0.289056
	T6S1	0.482994	0.483044	0.492366	1.4584	0.486135			T6S1	0.322736	0.306956	0.328799	0.958492	0.319497		T6S1	0.137802	0.138205	0.139414	0.415421	0.138474		T6S1	0.200986	0.201569	0.203319	0.605875	0.201958
	T6S2	0.723233	0.861441	0.673711	2.25838	0.752795			T6S2	0.476016	0.487275	0.452168	1.41546	0.47182		T6S2	0.181722	0.176886	0.176886	0.535495	0.178498		T6S2	0.26456	0.257561	0.257561	0.779682	0.259894
	T6S3	1.28491	1.28605	1.35538	3.92634	1.30878			T6S3	0.743239	0.754068	0.810642	2.30795	0.769316		T6S3	0.199853	0.201062	0.201062	0.601978	0.200659		T6S3	0.290806	0.292556	0.292556	0.875917	0.291972
	T6S4	1.66392	1.70484	1.77013	5.13889	1.71296			T6S4	1.0353	1.05783	1.08825	3.18138	1.06046		T6S4	0.219597	0.218791	0.218791	0.657179	0.21906		T6S4	0.319385	0.318218	0.318218	0.955822	0.318607
	T6S5	2.16545	2.22418	2.36146	6.75109	2.25036			T6S5	1.48678	1.52618	1.63355	4.64651	1.54884		T6S5	0.224432	0.225641	0.225641	0.675714	0.225238		T6S5	0.326384	0.328134	0.328134	0.982651	0.32755
	Total	23.1857	24.5326	25.3467	73.065				Total	16.2915	17.1005	17.6418	51.0338			Total	5.14784	5.08941	5.09667	15.3339			Total	7.4632	7.41246	7.42296	22.2986
	Antioxidant activity (mg TE/g FW) of total phenol extract under DPPH Assay								Antioxidant activity (mg TE/g FW) of total phenol extract under FRAP Assay								GR Specific Activity ( µmol NADPH oxidised/min /mg of protein)							GST Specific Activity ( µmol µmol imazethapyr conjugated/min /mg of protein)
	Treatments	R1	R2	R3	Total	Mean			Treatments	R1	R2	R3	Total	Mean			Treatments	R1	R2	R3	Total	Mean		Treatments	R1	R2	R3	Total	Mean
	T1S1	3.16	3.2	3.15	9.51	3.17			T1S1	1.64	1.62	1.67	4.93	1.64333			T1S1	35.8287	29.2316	35.5824	100.643	33.5476		T1S1	18.322	23.9026	17.2551	59.4797	19.8266
	T1S2	3.21	3.26	3.22	9.69	3.23			T1S2	1.65	1.62	1.66	4.93	1.64333			T1S2	23.3642	24.6818	23.2343	71.2803	23.7601		T1S2	14.3827	15.3491	14.3631	44.0949	14.6983
	T1S3	3.34	3.33	3.31	9.98	3.32667			T1S3	1.88	1.88	1.88	5.64	1.88			T1S3	23.851	22.4924	22.2873	68.6307	22.8769		T1S3	16.5823	16.3778	15.6597	48.6198	16.2066
	T1S4	3.47	3.44	3.5	10.41	3.47			T1S4	2.05	2.03	2.03	6.11	2.03667			T1S4	27.8739	26.8718	27.8789	82.6246	27.5415		T1S4	18.4024	17.2591	18.0449	53.7064	17.9021
	T1S5	3.54	3.56	3.55	10.65	3.55			T1S5	2.17	2.11	2.11	6.39	2.13			T1S5	32.264	31.8573	32.0235	96.1448	32.0483		T1S5	19.7144	19.5242	20.0022	59.2408	19.7469
	T2S1	3.16	3.2	3.15	9.51	3.17			T2S1	1.64	1.62	1.67	4.93	1.64333			T2S1	35.8287	29.2316	35.5824	100.643	33.5476		T2S1	18.322	23.9026	17.2551	59.4797	19.8266
	T2S2	3.58	3.6	3.57	10.75	3.58333			T2S2	1.96	1.96	1.99	5.91	1.97			T2S2	24.223	26.202	24.0579	74.4828	24.8276		T2S2	17.2582	17.767	17.0532	52.0784	17.3595
	T2S3	3.98	3.96	3.95	11.89	3.96333			T2S3	2.26	2.22	2.22	6.7	2.23333			T2S3	35.5814	38.407	36.5865	110.575	36.8583		T2S3	23.7523	25.3612	24.129	73.2425	24.4142
	T2S4	4.22	4.35	4.25	12.82	4.27333			T2S4	2.36	2.33	2.33	7.02	2.34			T2S4	47.1464	52.7622	54.0735	153.982	51.3274		T2S4	30.816	33.856	34.4343	99.1063	33.0354
	T2S5	4.32	4.34	4.3	12.96	4.32			T2S5	2.68	2.67	2.65	8	2.66667			T2S5	67.3486	71.5832	74.9931	213.925	71.3083		T2S5	46.7312	46.7361	50.3027	143.77	47.9233
	T3S1	3.16	3.2	3.15	9.51	3.17			T3S1	1.64	1.62	1.67	4.93	1.64333			T3S1	35.8287	29.2316	35.5824	100.643	33.5476		T3S1	18.322	23.9026	17.2551	59.4797	19.8266
	T3S2	3.7	3.72	3.68	11.1	3.7			T3S2	2.32	2.37	2.31	7	2.33333			T3S2	28.345	31.9555	31.7091	92.0096	30.6699		T3S2	19.7371	22.1949	22.2821	64.2142	21.4047
	T3S3	3.88	3.9	3.91	11.69	3.89667			T3S3	2.56	2.61	2.61	7.78	2.59333			T3S3	41.4835	46.3578	44.5698	132.411	44.1371		T3S3	27.991	31.4835	30.3339	89.8084	29.9361
	T3S4	4	4.02	4.02	12.04	4.01333			T3S4	2.83	2.83	2.83	8.49	2.83			T3S4	58.4886	67.9153	67.7115	194.115	64.7051		T3S4	36.1968	40.929	41.0502	118.176	39.392
	T3S5	4.05	4.1	4.08	12.23	4.07667			T3S5	3.2	3.16	3.16	9.52	3.17333			T3S5	75.0743	78.7534	90.2173	244.045	81.3483		T3S5	51.398	54.3459	61.8715	167.615	55.8718
	T4S1	3.16	3.2	3.15	9.51	3.17			T4S1	1.64	1.62	1.67	4.93	1.64333			T4S1	35.8287	29.2316	35.5824	100.643	33.5476		T4S1	18.322	23.9026	17.2551	59.4797	19.8266
	T4S2	3.80503	3.7673	3.77987	11.3522	3.78407			T4S2	2.60481	2.57045	2.56186	7.73711	2.57904			T4S2	24.2391	27.8315	27.4602	79.5308	26.5103		T4S2	18.9501	26.3538	26.5691	71.873	23.9577
	T4S3	4.09434	4.32075	4.2956	12.7107	4.2369			T4S3	2.66495	2.64777	2.69072	8.00344	2.66781			T4S3	44.8656	49.533	51.0605	145.459	48.4864		T4S3	32.3288	35.6904	36.3315	104.351	34.7836
	T4S4	4.33333	4.42138	4.4717	13.2264	4.40881			T4S4	3.06014	3.01718	3.03436	9.11168	3.03723			T4S4	64.9534	71.7082	76.7687	213.43	71.1435		T4S4	39.6647	43.5631	46.389	129.617	43.2056
	T4S5	4.39623	4.69811	4.71069	13.805	4.60168			T4S5	3.56701	3.52405	3.52405	10.6151	3.53837			T4S5	86.9193	92.0848	98.2217	277.226	92.4086		T4S5	62.164	65.9163	69.3888	197.469	65.823
	T5S1	3.16	3.2	3.15	9.51	3.17			T5S1	1.64	1.62	1.67	4.93	1.64333			T5S1	35.8287	29.2316	35.5824	100.643	33.5476		T5S1	18.322	23.9026	17.2551	59.4797	19.8266
	T5S2	3.95	3.94	3.92	11.81	3.93667			T5S2	2.81	2.84	2.9	8.55	2.85			T5S2	34.6052	37.799	38.6564	111.061	37.0202		T5S2	24.7137	26.8566	27.2612	78.8315	26.2772
	T5S3	4.54	4.53	4.56	13.63	4.54333			T5S3	3.27	3.27	3.27	9.81	3.27			T5S3	51.8832	53.1264	54.2653	159.275	53.0916		T5S3	36.11	37.314	38.2452	111.669	37.2231
	T5S4	4.8	4.79	4.82	14.41	4.80333			T5S4	3.58	3.6	3.6	10.78	3.59333			T5S4	74.5106	81.3967	82.7855	238.693	79.5643		T5S4	44.3821	48.1516	49.22	141.754	47.2512
	T5S5	4.92	4.96	4.94	14.82	4.94			T5S5	4.08	4.09	4.07	12.24	4.08			T5S5	88.1762	102.424	93.7831	284.383	94.7944		T5S5	65.0028	75.6827	68.5728	209.258	69.7528
	T6S1	3.16	3.2	3.15	9.51	3.17			T6S1	1.64	1.62	1.67	4.93	1.64333			T6S1	35.8287	29.2316	35.5824	100.643	33.5476		T6S1	18.322	23.9026	17.2551	59.4797	19.8266
	T6S2	4.05	4.09	4.08	12.22	4.07333			T6S2	3.18	3.16	3.18	9.52	3.17333			T6S2	27.8185	44.0103	40.5168	112.346	37.4485		T6S2	29.6145	29.7898	27.0991	86.5034	28.8345
	T6S3	4.98	4.96	4.98	14.92	4.97333			T6S3	3.76	3.77	3.77	11.3	3.76667			T6S3	62.724	63.1869	66.1438	192.055	64.0182		T6S3	40.7336	41.1472	43.3391	125.22	41.7399
	T6S4	5.26	5.28	5.3	15.84	5.28			T6S4	4.23	4.22	4.22	12.67	4.22333			T6S4	71.6846	73.115	75.8668	220.666	73.5555		T6S4	51.0079	52.2402	54.6821	157.93	52.6434
	T6S5	5.38	5.42	5.44	16.24	5.41333			T6S5	4.47	4.48	4.46	13.41	4.47			T6S5	117.778	120.039	127.084	364.901	121.634		T6S5	81.1073	82.9545	88.4346	252.496	84.1655
	Total	118.759	119.958	119.538	358.254				Total	79.0369	78.6995	79.081	236.817				Total	1450.17	1511.48	1575.45	4537.11			Total	958.674	1050.26	1028.59	3037.52
				Total thiol content of lentil (µmol GSH/g FW)
	Treatments	R1	R2	R3	Total	Mean
	T1S1	2.6227	2.51363	2.56786	7.70419	2.56806
	T1S2	2.78478	2.70344	2.83901	8.32723	2.77574
	T1S3	2.97459	3.02882	3.08306	9.08647	3.02882
	T1S4	3.13729	3.11017	3.05594	9.3034	3.10113
	T1S5	3.51691	3.46268	3.54402	10.5236	3.50787
	T2S1	2.6227	2.51363	2.56786	7.70419	2.56806
	T2S2	3.43556	3.27287	3.48979	10.1982	3.39941
	T2S3	3.89642	3.81518	3.78806	11.4997	3.83322
	T2S4	4.79134	4.73711	4.65577	14.1842	4.72807
	T2S5	5.14385	5.17096	5.2252	15.54	5.18
	T3S1	2.6227	2.51363	2.56786	7.70419	2.56806
	T3S2	3.62537	3.65249	3.57114	10.849	3.61633
	T3S3	4.14057	4.08634	4.11345	12.3404	4.11345
	T3S4	5.25231	5.19808	5.17096	15.6214	5.20712
	T3S5	5.68616	5.74039	5.79463	17.2212	5.74039
	T4S1	2.6227	2.51363	2.56786	7.70419	2.56806
	T4S2	3.76095	3.73383	3.65249	11.1473	3.71576
	T4S3	4.22191	4.24903	4.1948	12.6657	4.22191
	T4S4	5.33366	5.38789	5.30654	16.0281	5.3427
	T4S5	5.84886	5.9302	5.98444	17.7635	5.92117
	T5S1	2.6227	2.51363	2.56786	7.70419	2.56806
	T5S2	3.89653	3.81518	3.97787	11.6896	3.89653
	T5S3	4.33038	4.35749	4.43884	13.1267	4.37557
	T5S4	5.44212	5.55058	5.60482	16.5975	5.53251
	T5S5	6.0929	6.12001	6.20136	18.4143	6.13809
	T6S1	2.6227	2.51363	2.56786	7.70419	2.56806
	T6S2	5.08962	5.11673	4.95404	15.1604	5.05346
	T6S3	5.41501	5.46924	5.49635	16.3806	5.4602
	T6S4	5.90309	5.98444	6.03867	17.9262	5.9754
	T6S5	7.04195	7.06906	7.15041	21.2614	7.08714
	Total	126.498	125.844	126.739	379.081
